# Supplementary material for: A Novel Calcium-Mediated EMT Pathway Controlled by Lipids: An Opportunity for Prostate Cancer Adjuvant Therapy
Source: MDPI journal article supplement (doi:10.3390/cancers11111814), 2019-11-18

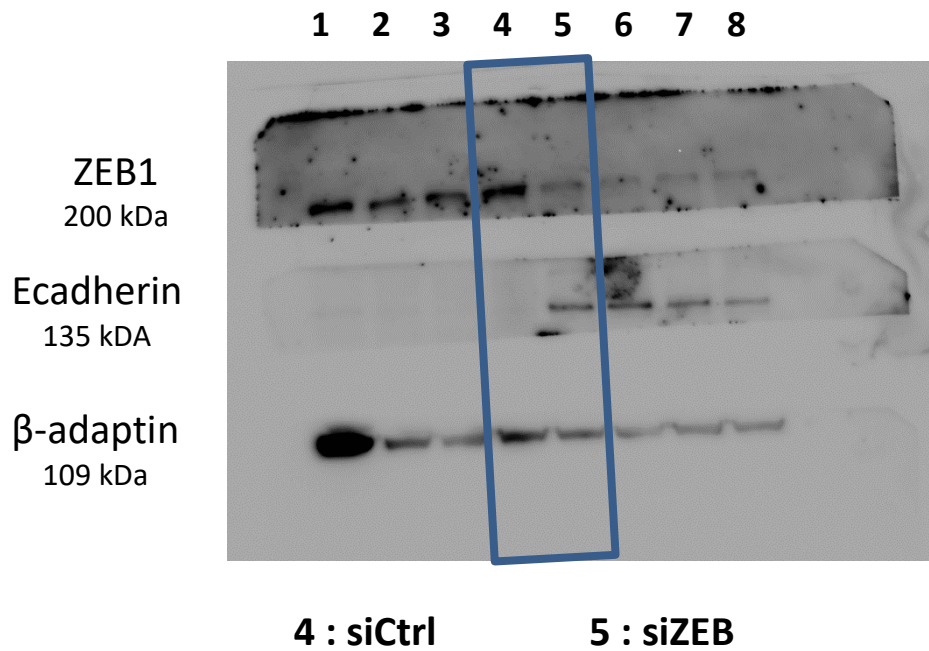

Zeb1 protein rate quantification  
(/ $\beta$ -adaptin)

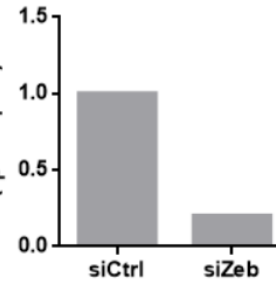

Ecadh protein rate quantification  
(/ $\beta$ -adaptin)

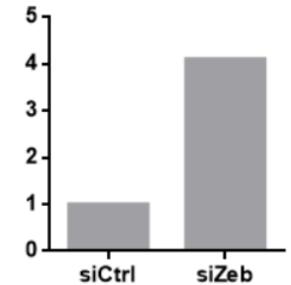

Ponceau S  
staining

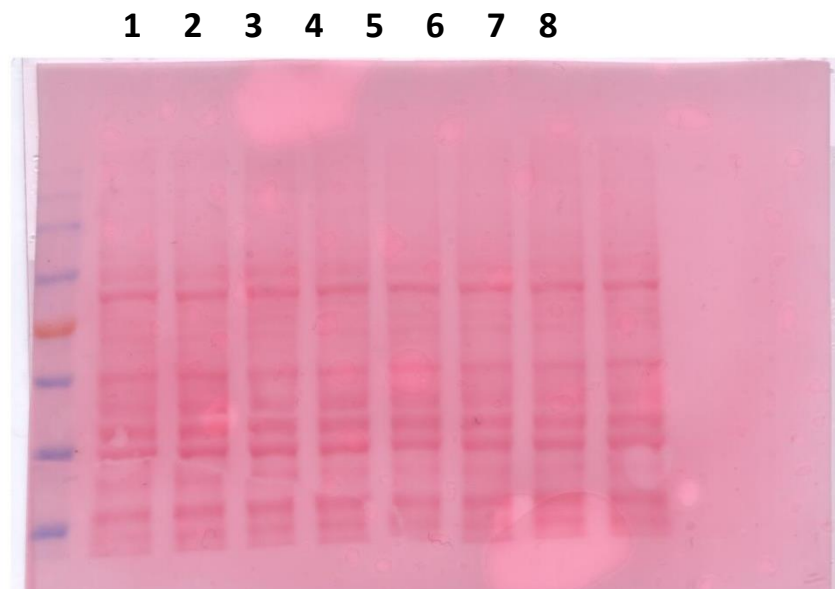

Supplement: s1 [file s1]
