# Supplementary material for: A Novel Calcium-Mediated EMT Pathway Controlled by Lipids: An Opportunity for Prostate Cancer Adjuvant Therapy
Source: MDPI journal article supplement (doi:10.3390/cancers11111814), 2019-11-18
Supplement: s1 [file s1]

# Supplementary Materials

**Table S1.** Ca<sup>2+</sup>-free PSS composition used for cytosolic Ca<sup>2+</sup> measurements in cell lines (ph adjusted to 7.4 with NaOH).

| Solution          | Concentration (mM) |
|-------------------|--------------------|
| NaCl              | 140                |
| MgCl <sub>2</sub> | 2                  |
| KCl               | 4                  |
| D-Glucose         | 11.1               |
| HEPES             | 10                 |
| EGTA              | 1                  |

**Table S2.** siRNA sequences used for transfection assays.

| Name      | Sequences 5'-3'                                            |
|-----------|------------------------------------------------------------|
| siControl | 5'-GGAAAGACGAUGACGGAAAUU-3'<br>5'-UUUCCGUCAUCGUCUUUCCUU-3' |
| siZeb     | 5'-AACUGAACCGUGGGAUUUUU-3'<br>5'-AUAAUCCACAGGUUCAGUUUU-3'  |
| siSK3     | 5'-UAGUCACUCAGUCGCUUUC-3'<br>5'-GAAAGCGACUGAGUGACUA-3'     |

**Table S3.** Primers used for quantitative real-time PCR.

| Name               | Sequence 5'-3'           |
|--------------------|--------------------------|
| Zeb1 forward       | TGCACTGAGTGTGGAAAAGC     |
| Zeb1 reverse       | TGGTGATGCTGAAAGAGACG     |
| N-cadherin forward | GGCGTTATGTGTGTATCTTCACTG |
| N-cadherin reverse | GCAGGCTCACTGCTCTCATA     |
| MMP9 forward       | ACGCACGACGTCTTCCAGTA     |
| MMP9 reverse       | CCACCTGGTTCAACTCACTCC    |
| SK3 forward        | TGGACACTCAGCTCACCAAG     |
| SK3 reverse        | GTTCCATCTTGACGCTCCTC     |
| Snail forward      | AATCCAGAGTTTACCTTCCAGCA  |
| Snail reverse      | TCCCAGATGAGCATTGGCAG     |
| Slug forward       | GAACTGGACACACATACAGTGAT  |
| Slug reverse       | ACAGTGATGGGGCTGTATGC     |

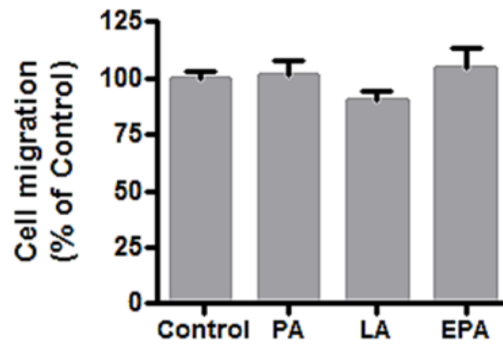

**Figure S1:** Effect of fatty acids on basal migration. DU145 cells were treated for 48h with Figure 20.  $\mu$ M) and then used for transwell assay performed for 24 h. Results are expressed as mean  $\pm$  SEM.  $N = 3$ ;  $n = 2$ .

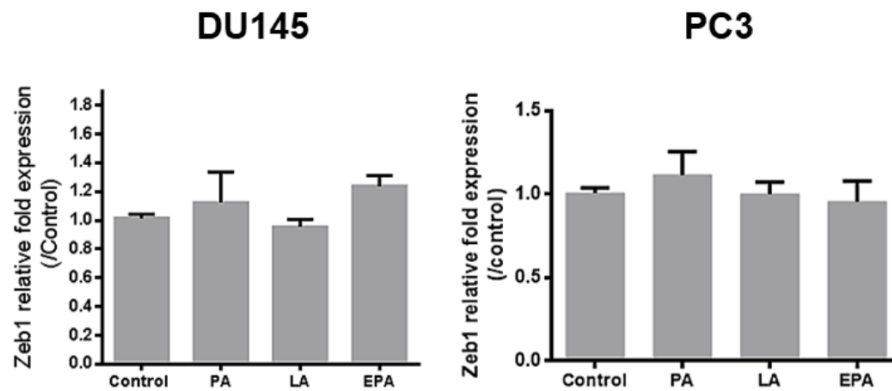

**Figure S2.** Effect of fatty acids on basal Zeb1 expression. DU145 and PC3 cells were treated for 48 h with fatty acids (20  $\mu$ M). qPCR results are expressed as mean  $\pm$  SEM.  $N = 3$ ;  $n = 3$ .

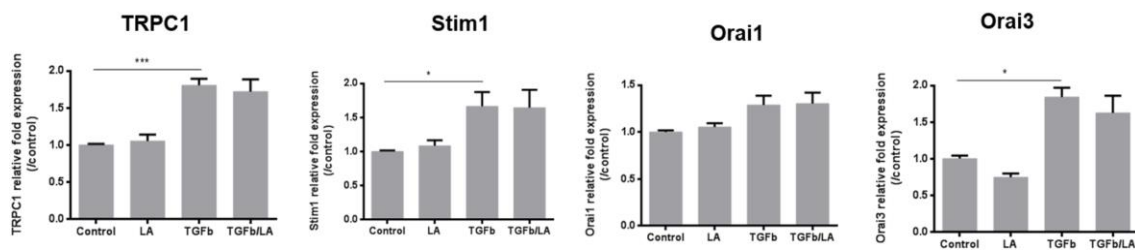

**Figure S3.** Effect of LA on the expression of TRPC1, STIM1, Orai1 and Orai3. PC3 cells were co-treated for 48 h with TGF and fatty acids (20  $\mu$ M). qPCR results are expressed as mean  $\pm$  SEM.  $N = 3$ ;  $n = 3$ .

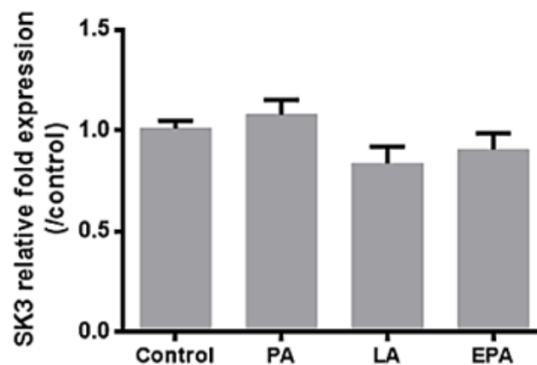

**Figure S4.** Effect of Fatty acids on basal SK3 expression. Cells were treated for 48 h by fatty acids (20  $\mu$ M). qPCR results are expressed as mean  $\pm$  SEM.  $N = 3$ ;  $n = 3$ .

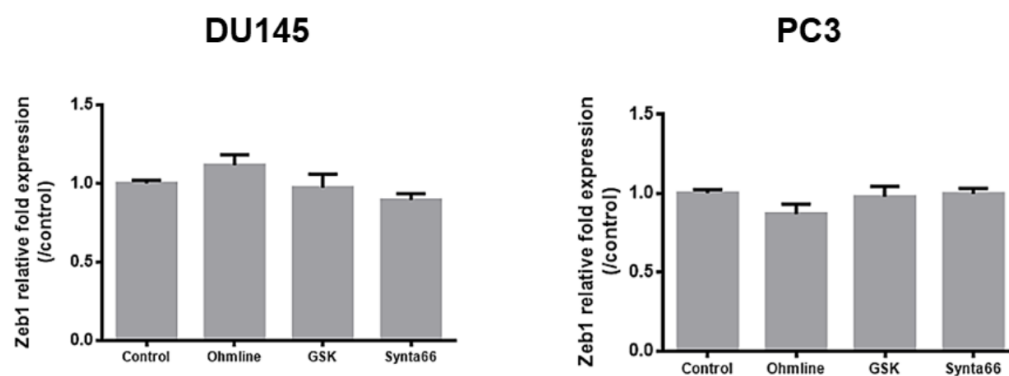

**Figure S5:** Effect of Ca<sup>2+</sup> channel inhibitors on Zeb1 basal expression. PCa cells were treated with TGF $\beta$  (10 ng/mL)  $\pm$  GSK7975A, Synta66, or Ohmline (1  $\mu$ M) for 48 h. qPCR results are expressed as mean  $\pm$  SEM.  $N = 3$ ;  $n = 3$ .
